# Supplementary material for: Potential Diagnostic and Prognostic Values of CBX8 Expression in Liver Hepatocellular Carcinoma, Kidney Renal Clear Cell Carcinoma, and Ovarian Cancer: A Study Based on TCGA Data Mining
Source: Hindawi journal article supplement (doi:10.1155/2022/1372879), 2022-06-29
Supplement: f1 [file 1372879.f1.zip]

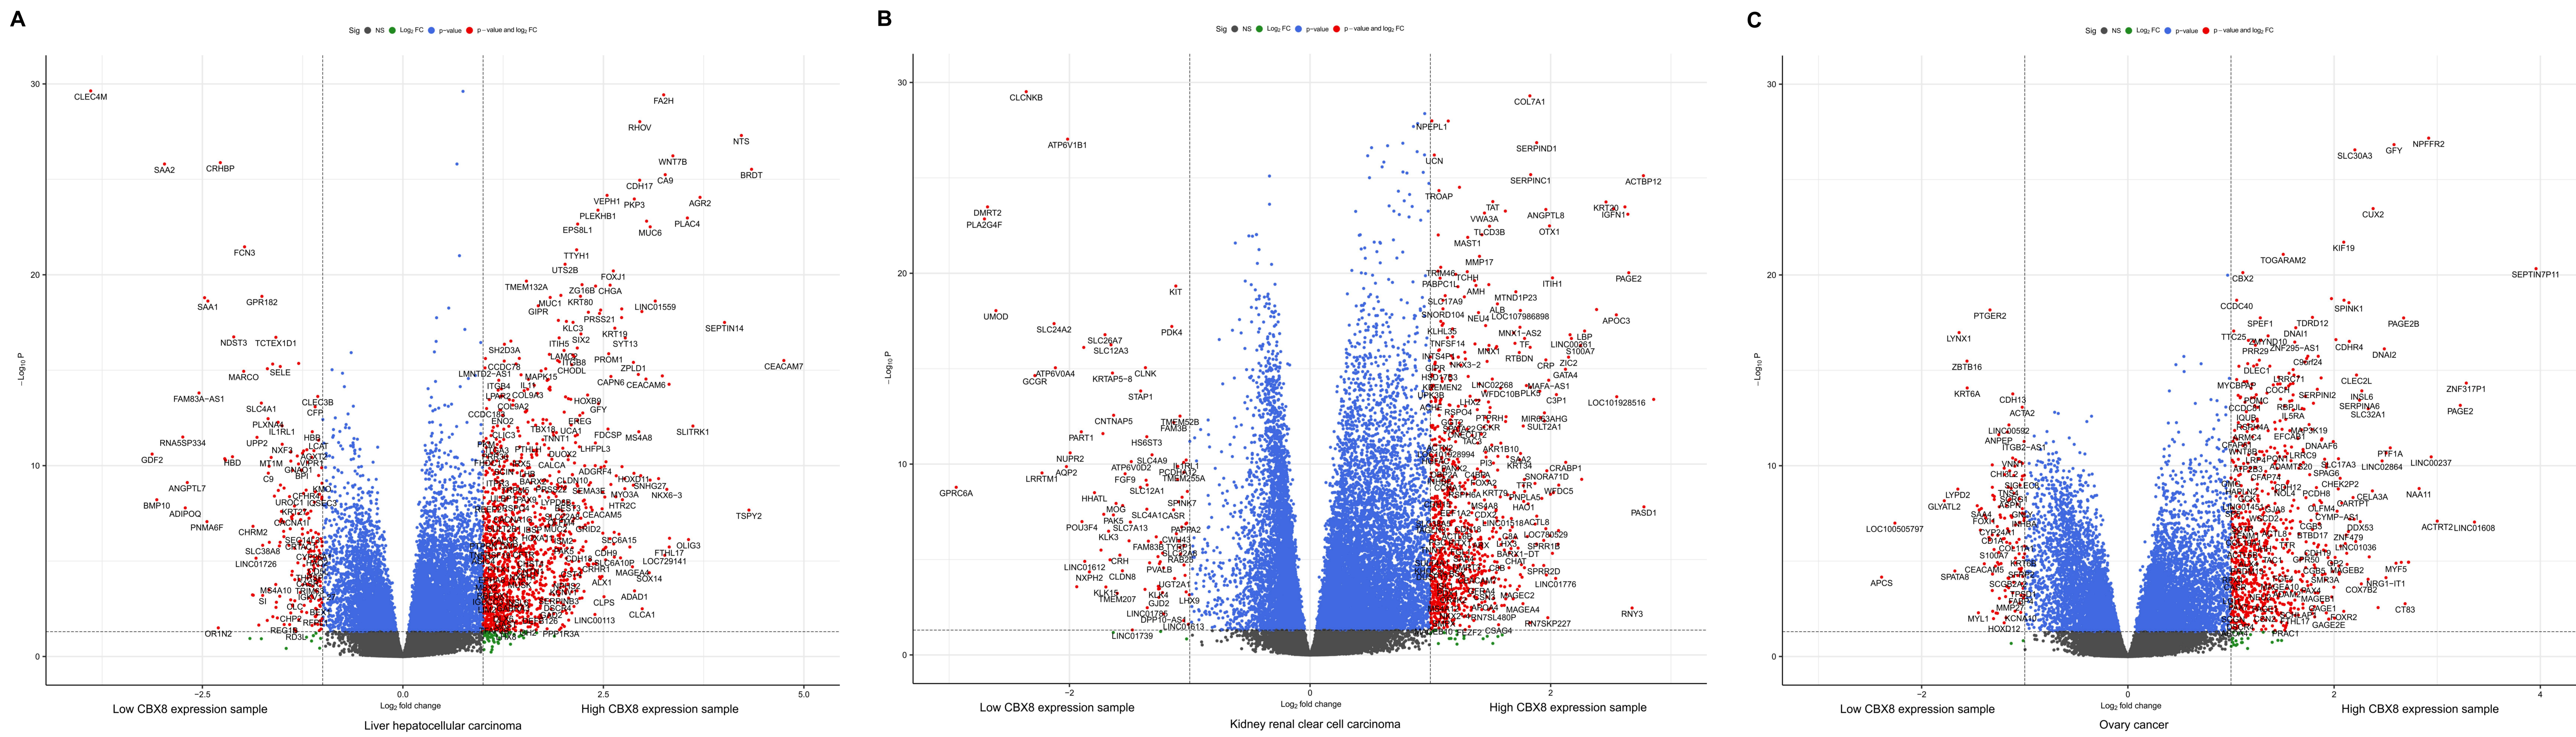

**Figure S1** Analysis of CBX8-related upregulation and downregulation genes in higher CBX8 samples across LIHC, KIRC, and OV.
