# Supplementary material for: Potential Diagnostic and Prognostic Values of CBX8 Expression in Liver Hepatocellular Carcinoma, Kidney Renal Clear Cell Carcinoma, and Ovarian Cancer: A Study Based on TCGA Data Mining
Source: Hindawi journal article supplement (doi:10.1155/2022/1372879), 2022-06-29
Supplement: f1 [file 1372879.f1.zip]

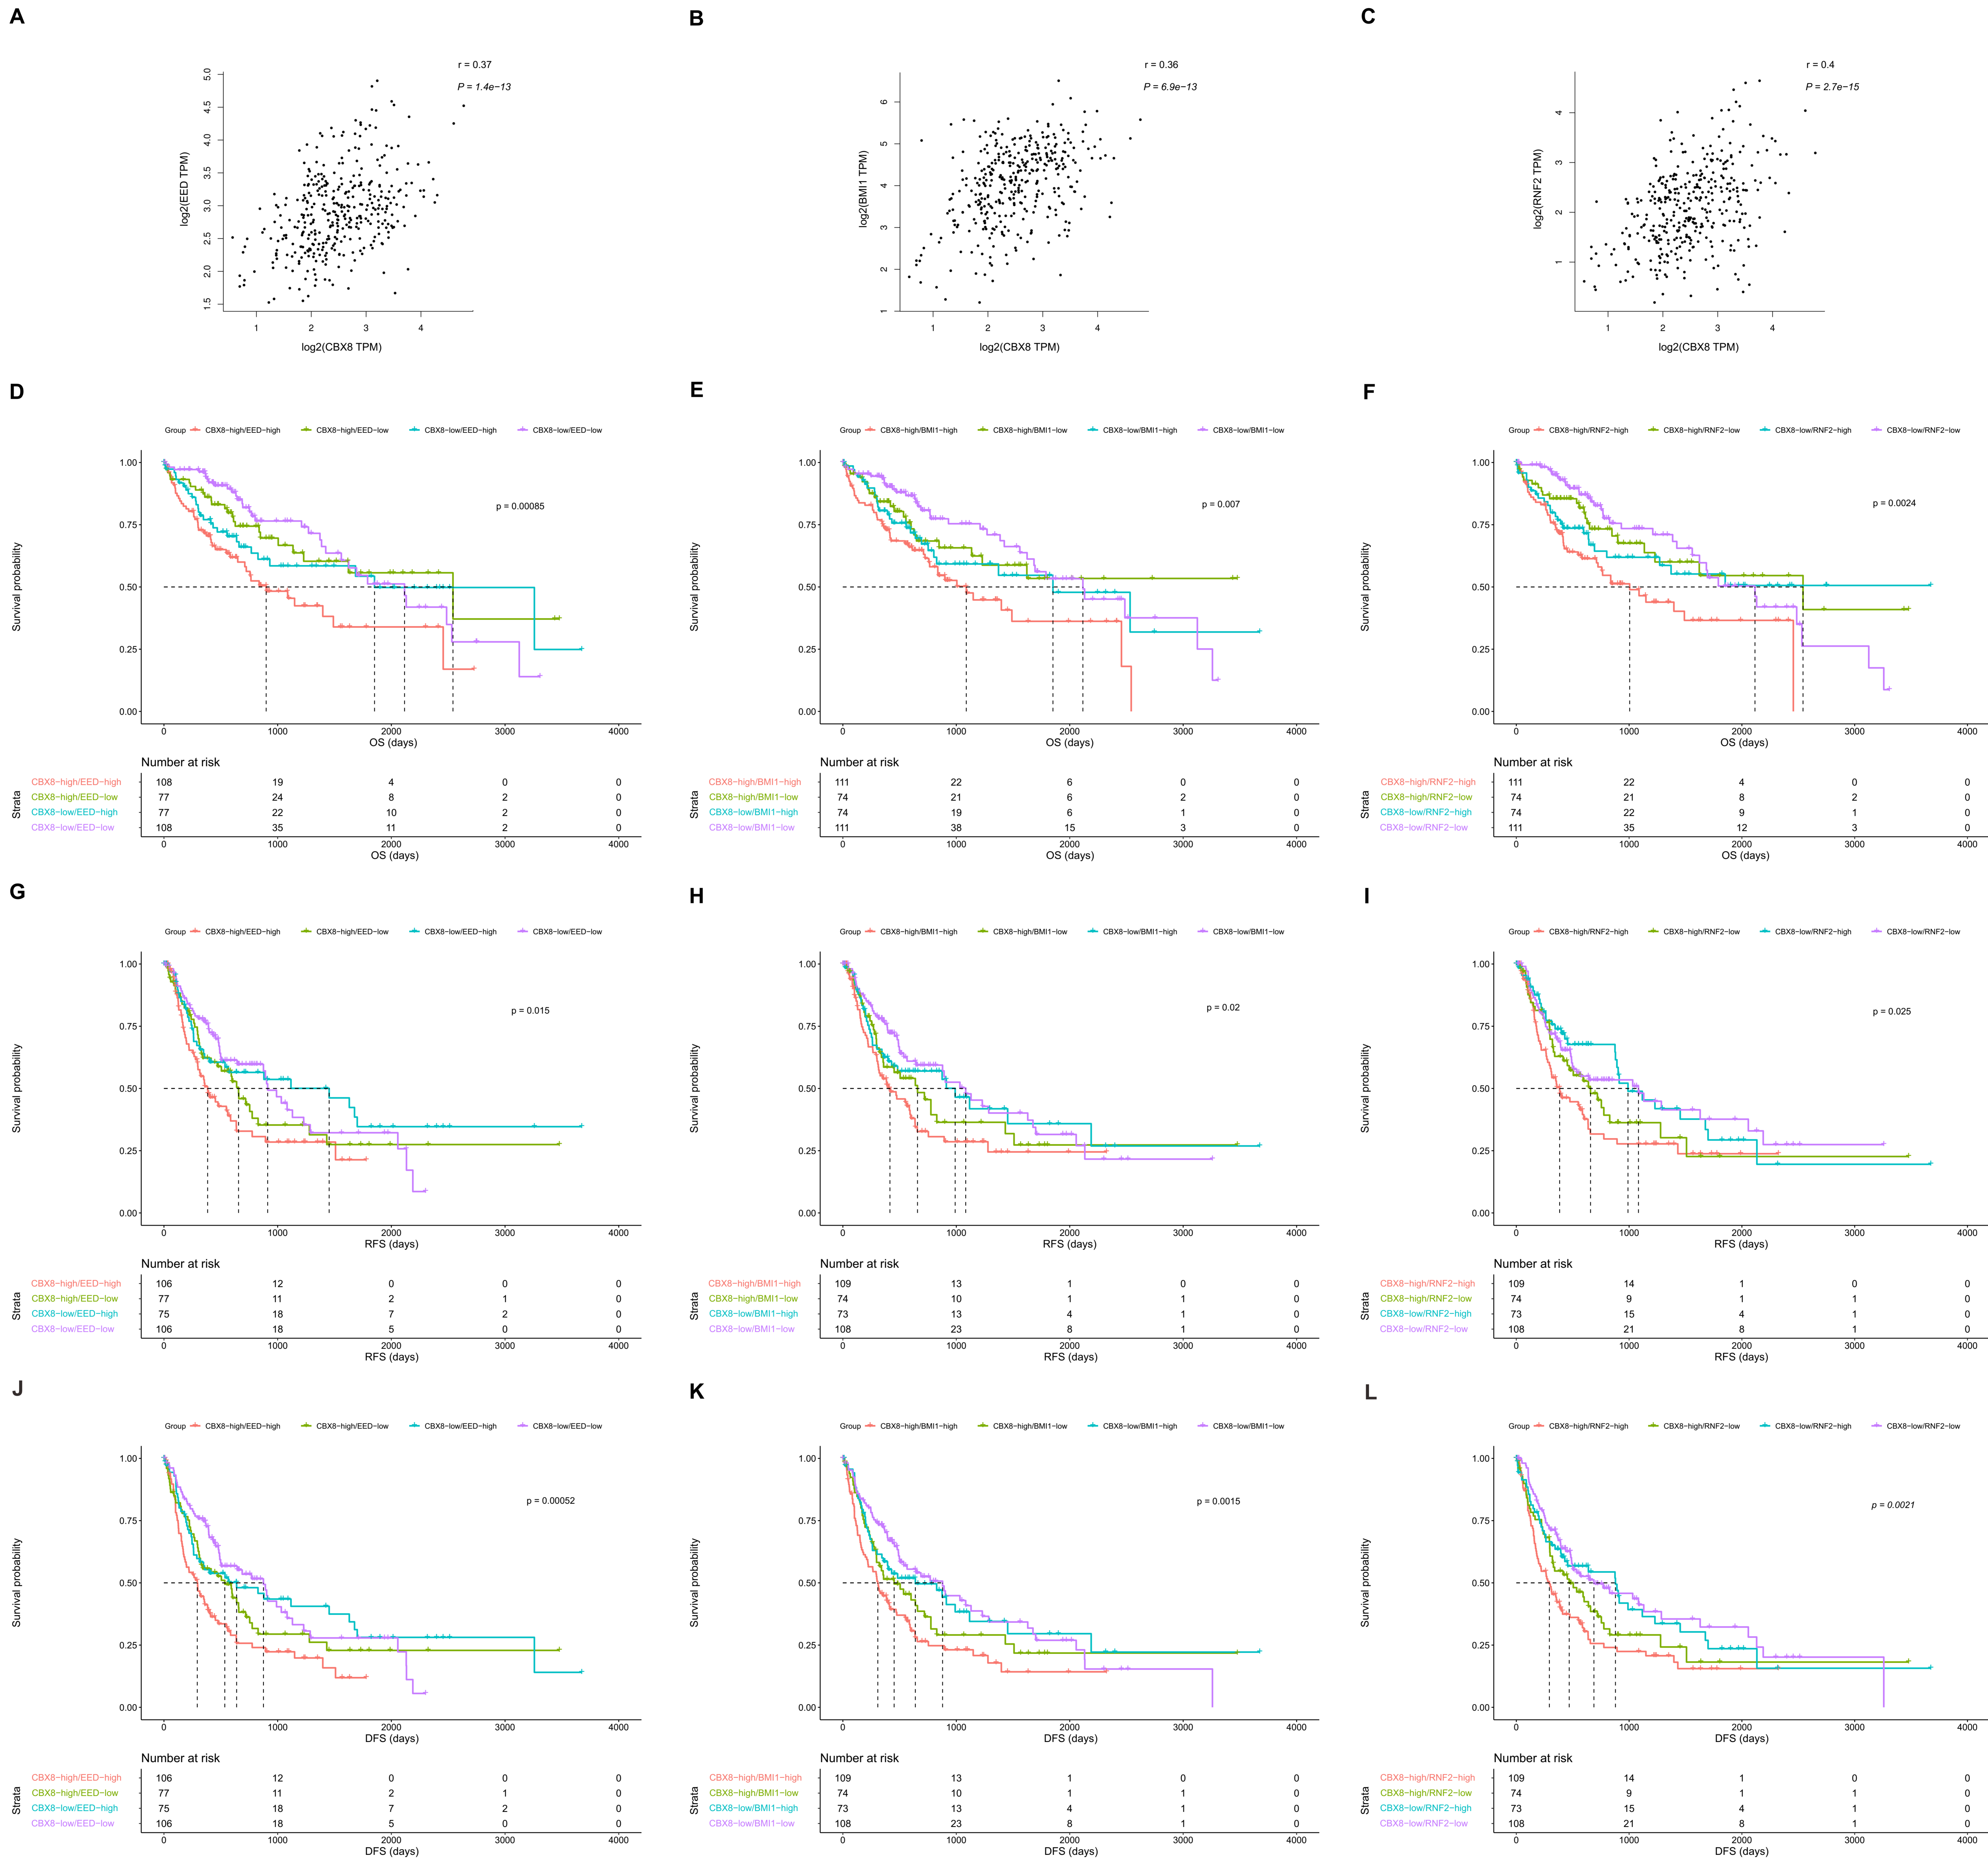

**Figure S3** The survival outcomes in Liver hepatocellular carcinoma patients with different gene combinations (CBX8-EED; CBX8- BM1, and CBX8-RNF2). (A), (B), and (C) Pearson correlation analysis between CBX8 and EED, BM1, and RNF2, respectively; (D), (E), and (F) OS for different gene combinations; (G), (H), and (I) RFS for different gene combinations. (J), (K), and (L) DFS for different gene combinations Color images are available online.
