# Supplementary figures and images for: Potential Diagnostic and Prognostic Values of CBX8 Expression in Liver Hepatocellular Carcinoma, Kidney Renal Clear Cell Carcinoma, and Ovarian Cancer: A Study Based on TCGA Data Mining
Source: Hindawi journal article supplement (doi:10.1155/2022/1372879), 2022-06-29

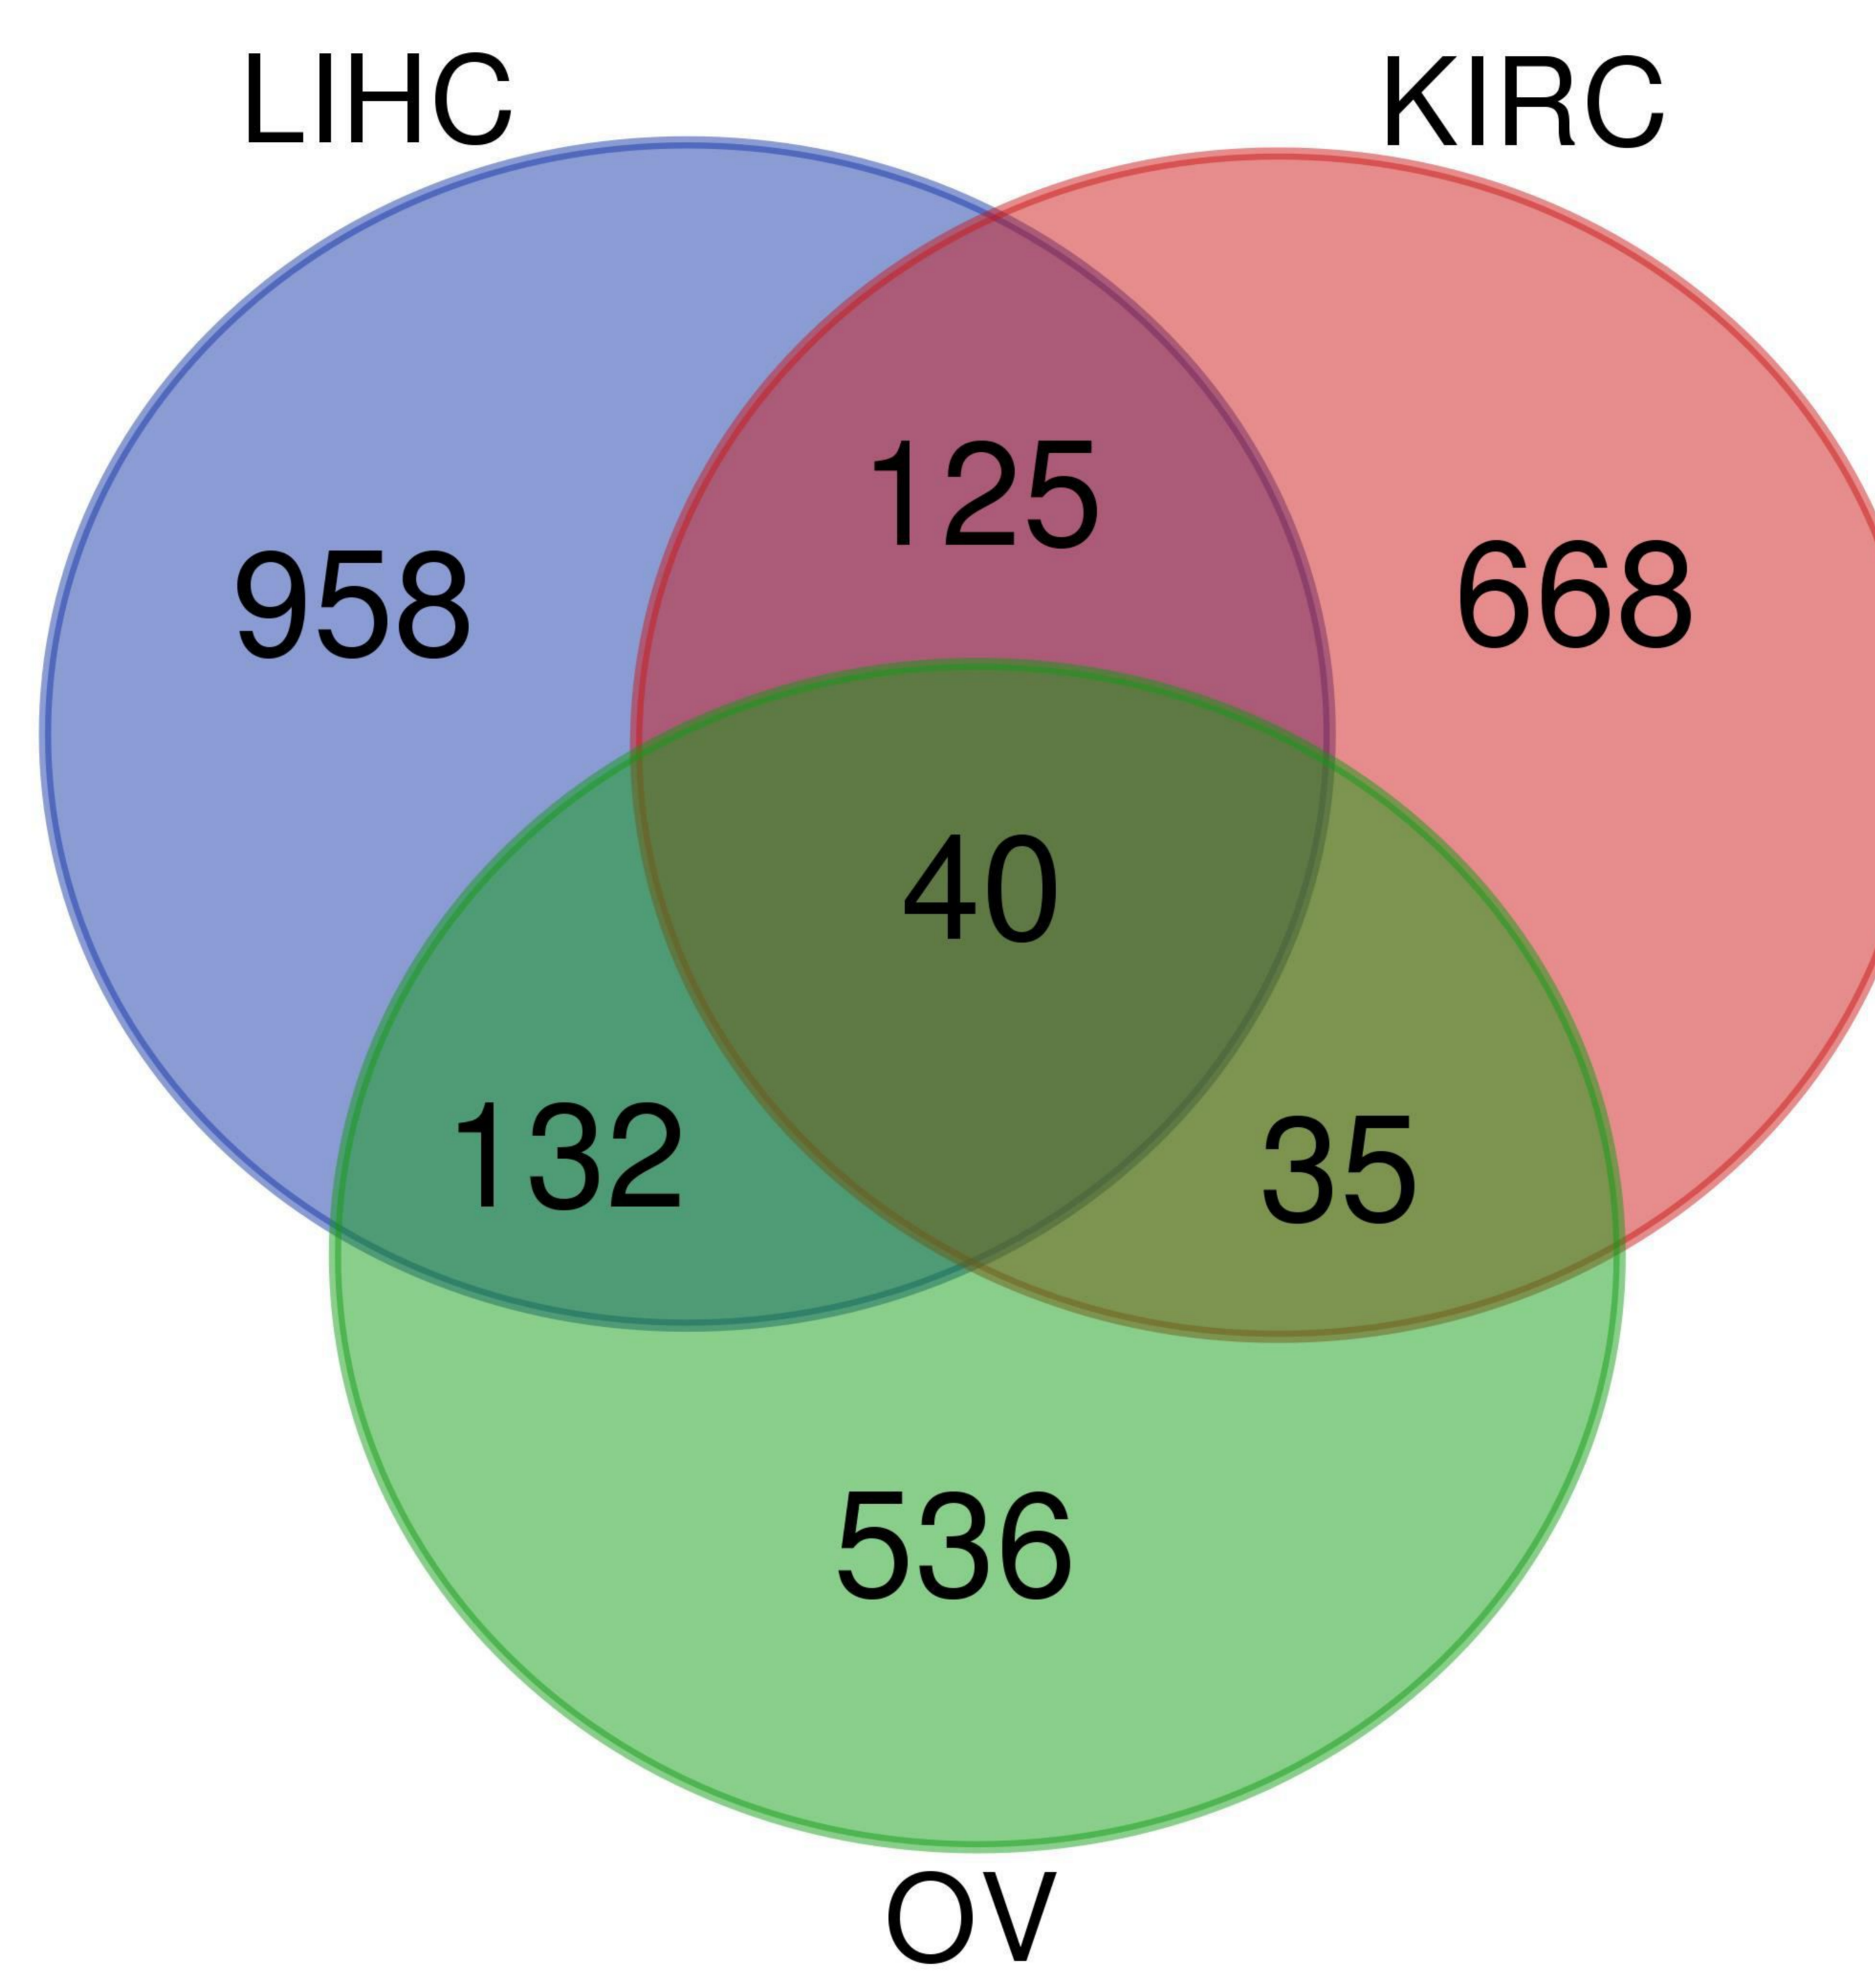

**Figure S2** Analysis of the same CBX8-related upregulation genes in LIHC, KIRC and OV.

Supplement: f1 [file 1372879.f1.zip]
